# Supplementary material for: Potential limitations of microdystrophin gene therapy for Duchenne muscular dystrophy
Source: PubMed Central journal article supplement (PMC11382885; doi:10.1172/jci.insight.165869), 2024-05-07
Supplement: jciinsight-9-165869-s129.pdf [file jciinsight-9-165869-s129.pdf]

# Figure 2C – heart

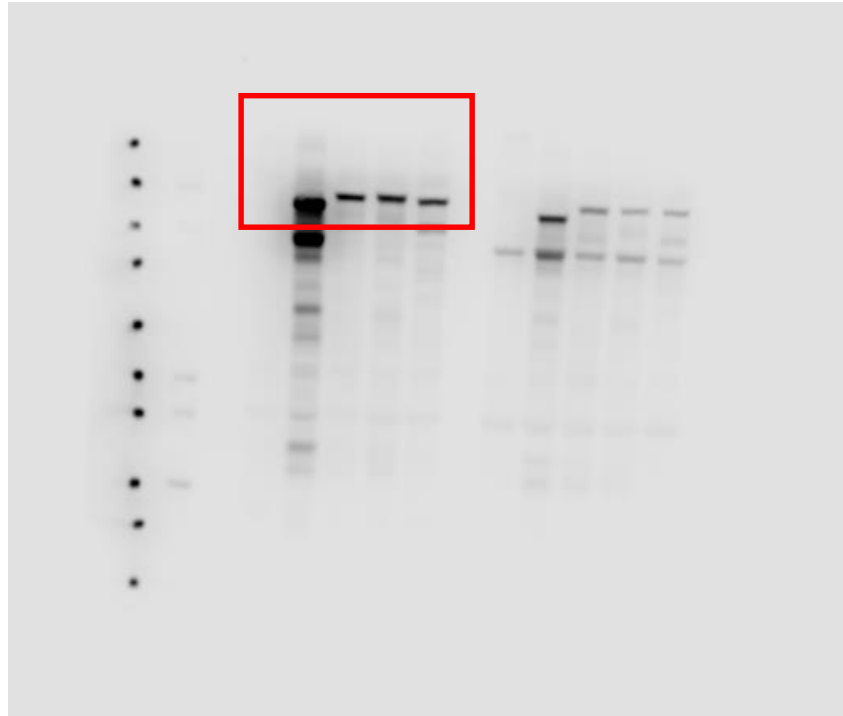

Mixture of: (Developmental Studies Hybridoma bank)

MANHINGE1B (Clone 10F9)

MANEX1011B (Clone 1C7)

MANEX1011C (Clone 4F9)

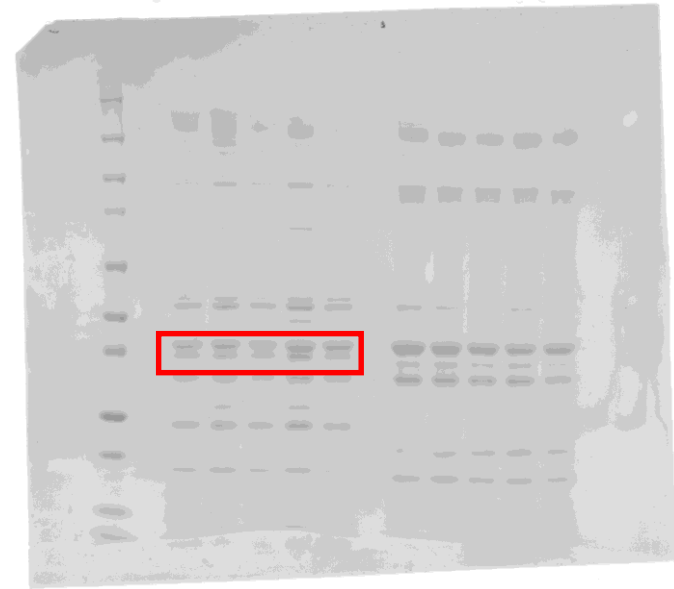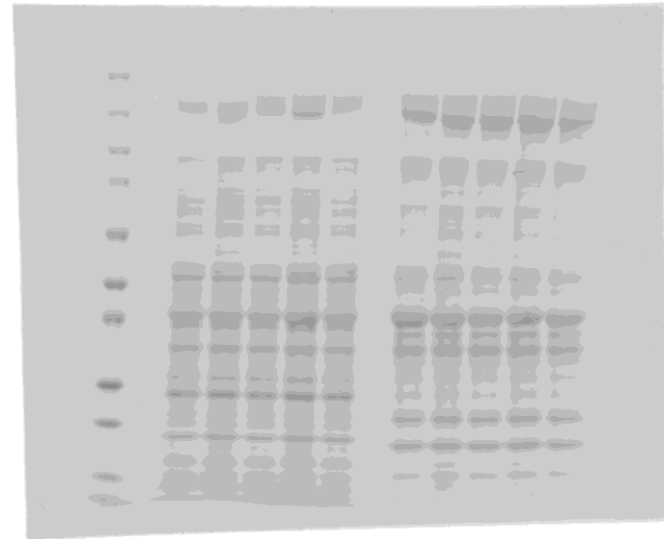

Ponceau S

# Figure 2C – gastrocnemius

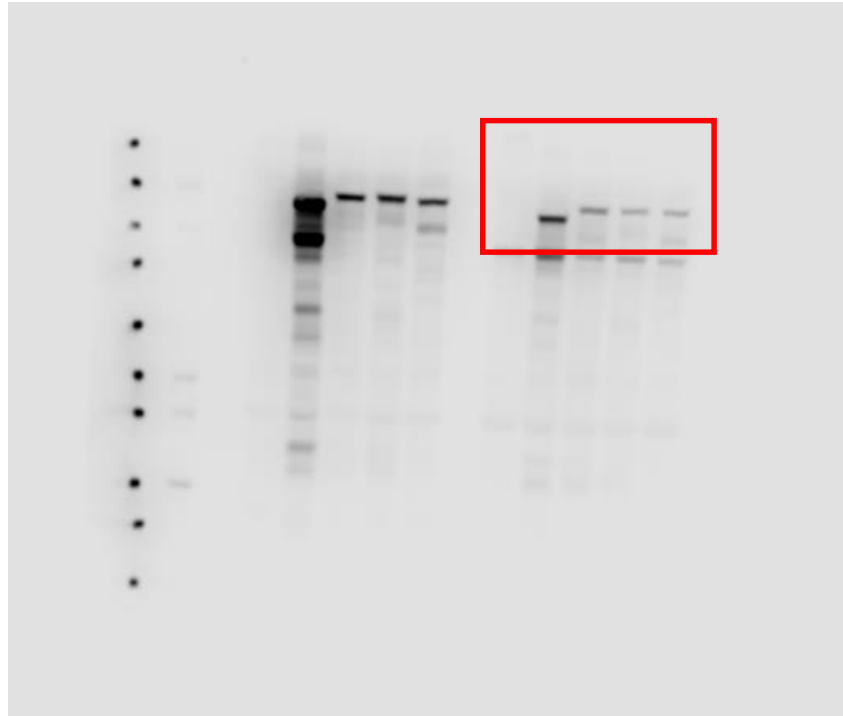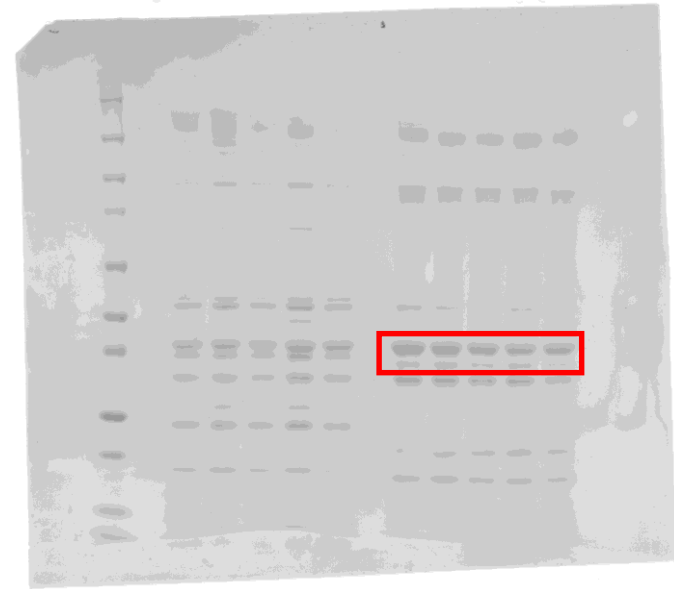

Ponceau S

Mixture of: (Developmental Studies Hybridoma bank)

MANHINGE1B (Clone 10F9)

MANEX1011B (Clone 1C7)

MANEX1011C (Clone 4F9)

# Figure 2D – heart

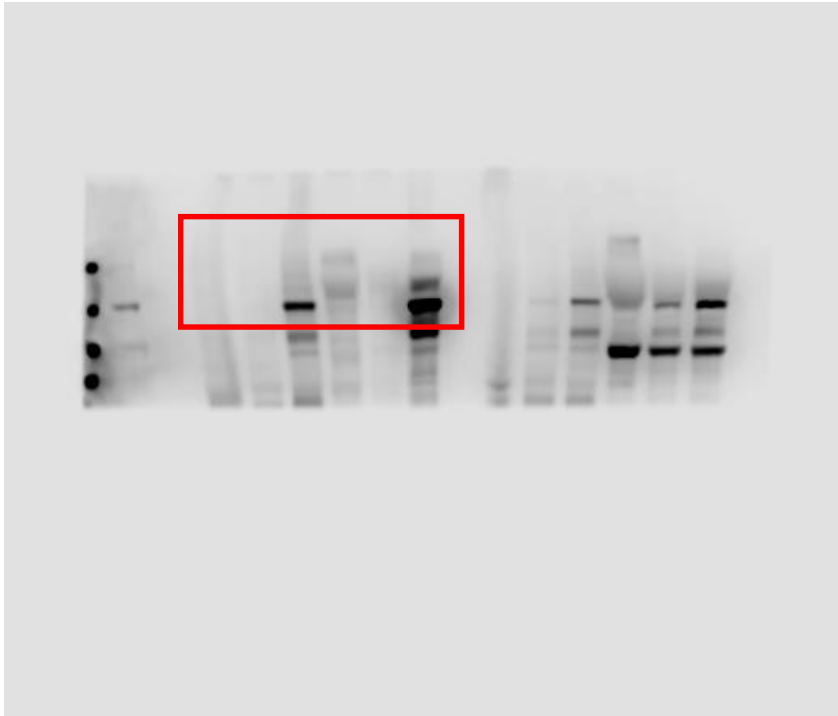

Mixture of: (Developmental Studies Hybridoma bank)

MANHINGE1B (Clone 10F9)

MANEX1011B (Clone 1C7)

MANEX1011C (Clone 4F9)

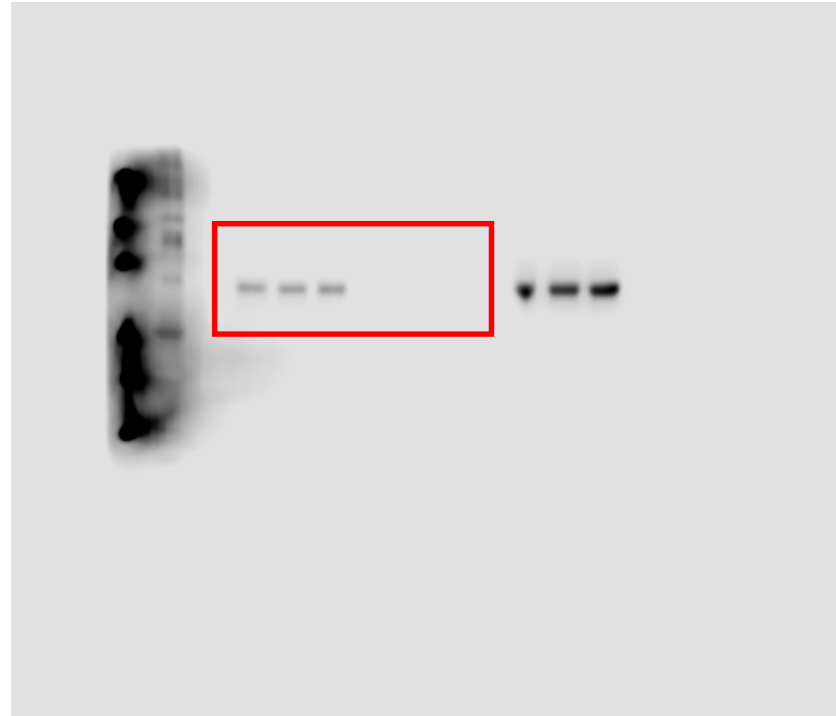

GAPDH (SC-25778; Santa Cruz BioTech)

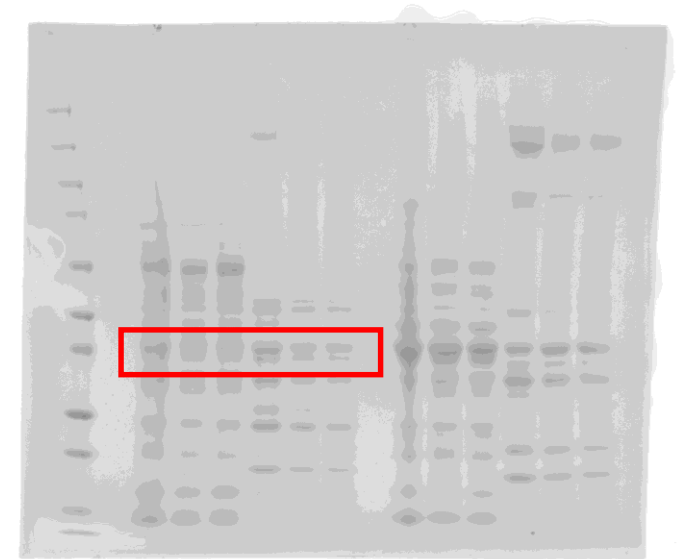

Ponceau S

# Figure 2D – gastrocnemius

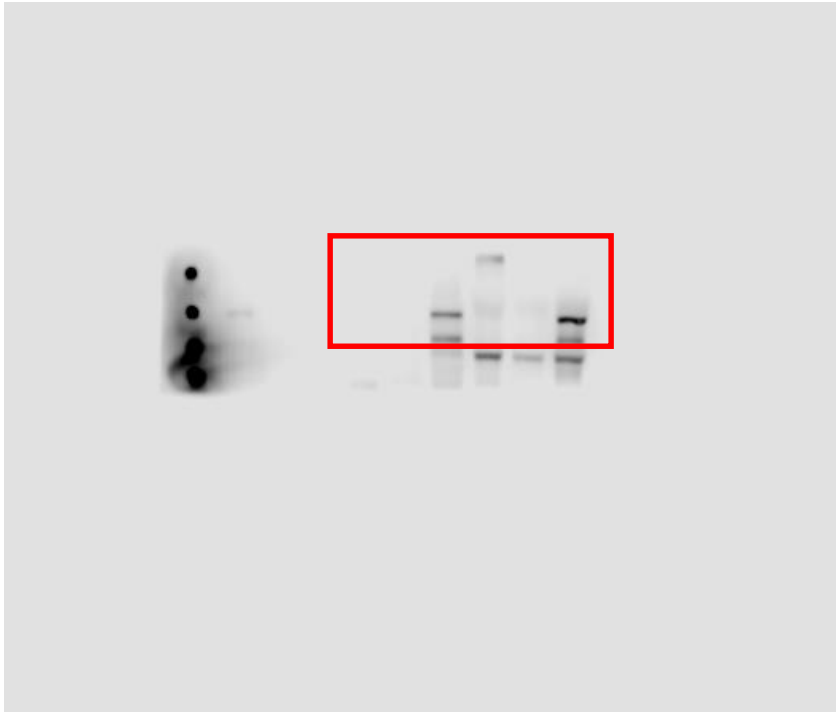

Mixture of: (Developmental Studies Hybridoma bank)

MANHINGE1B (Clone 10F9)

MANEX1011B (Clone 1C7)

MANEX1011C (Clone 4F9)

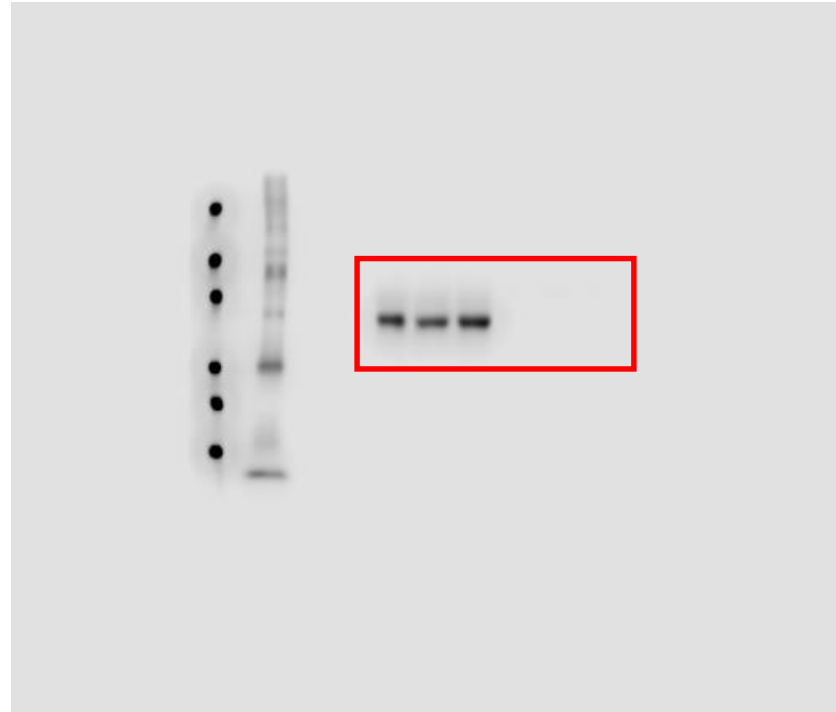

GAPDH (SC-25778; Santa Cruz BioTech)

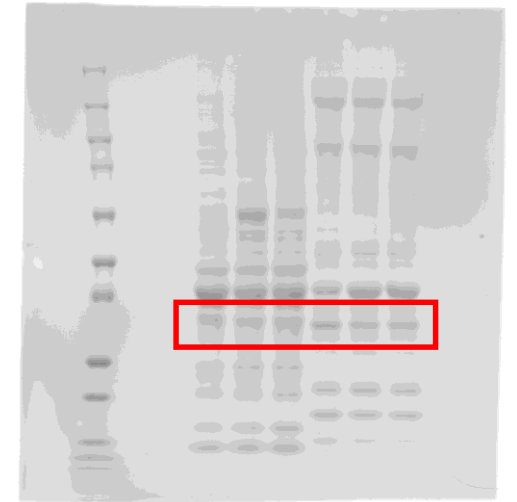

Ponceau S

# Figure 5A – MDC1

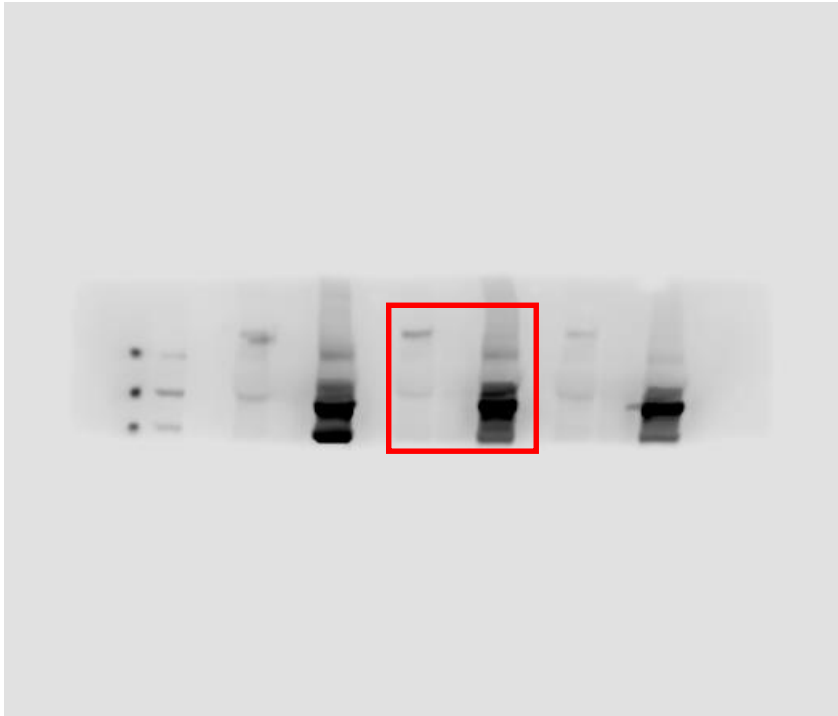

Mixture of: (Developmental Studies Hybridoma bank)

MANHINGE1B (Clone 10F9)  
MANEX1011B (Clone 1C7)  
MANEX1011C (Clone 4F9)

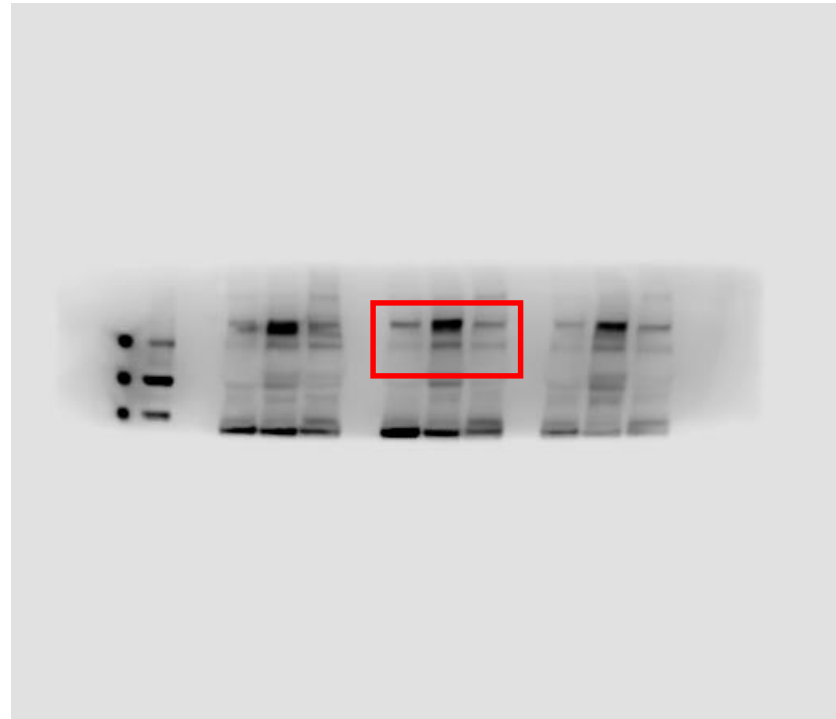

Utrophin-A (ABN1739; EMD Millipore)

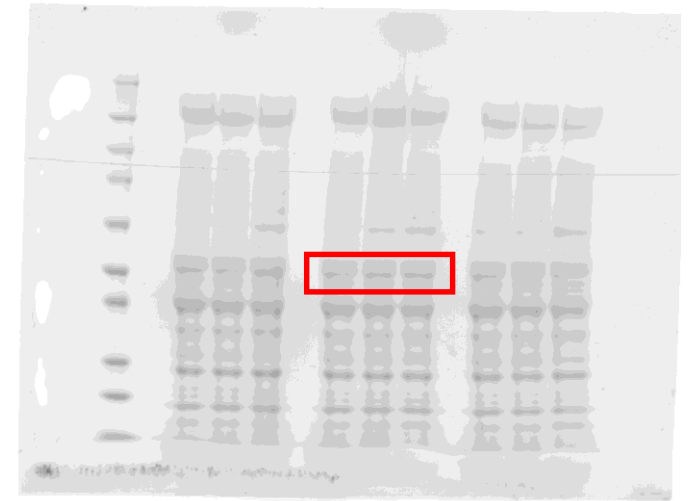

Ponceau S

# Figure 5A – MDC4

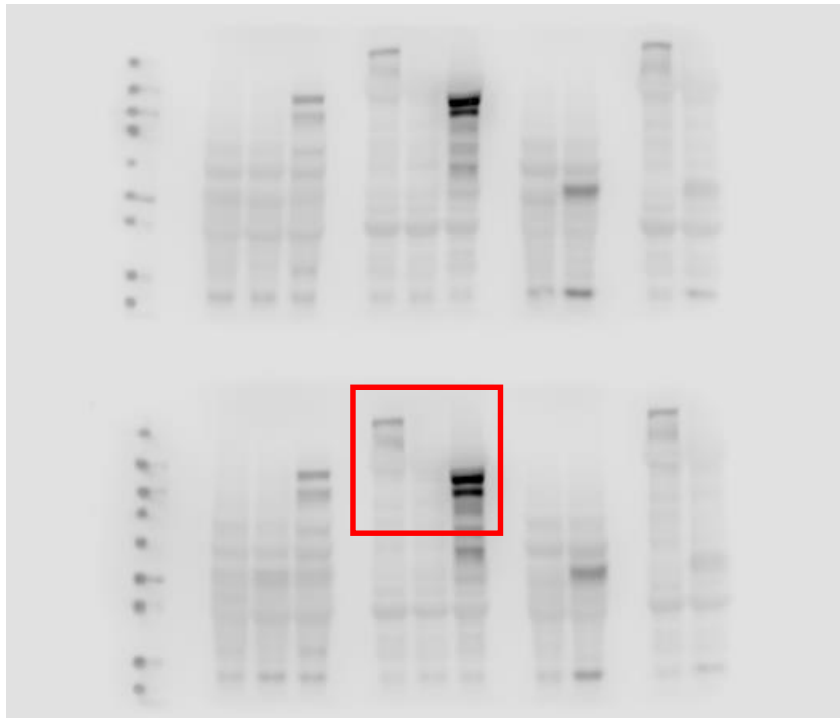

Mixture of: (Developmental Studies Hybridoma bank)

MANHINGE1B (Clone 10F9)  
MANEX1011B (Clone 1C7)  
MANEX1011C (Clone 4F9)

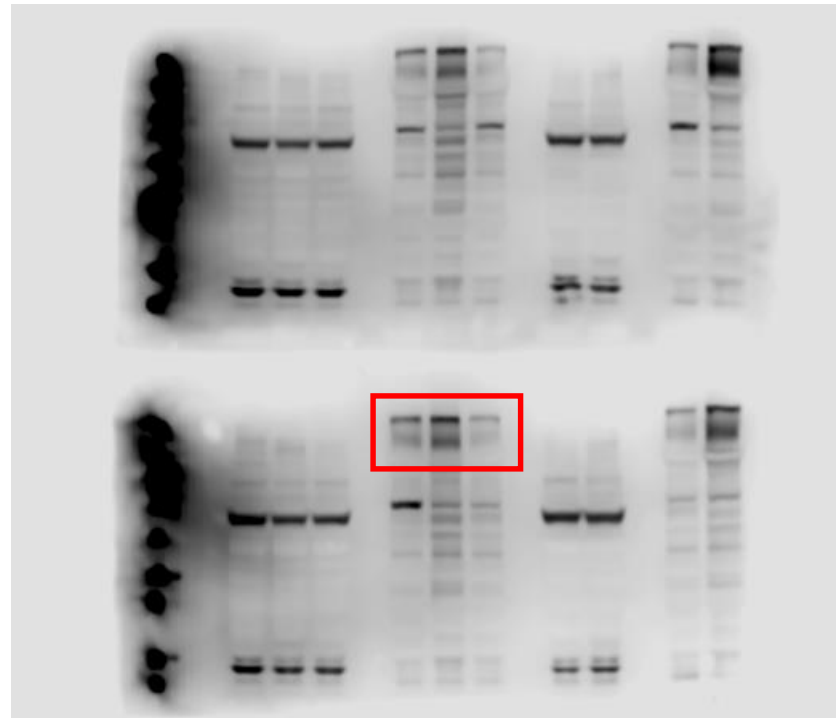

Utrrophin-A (ABN1739; EMD Millipore)

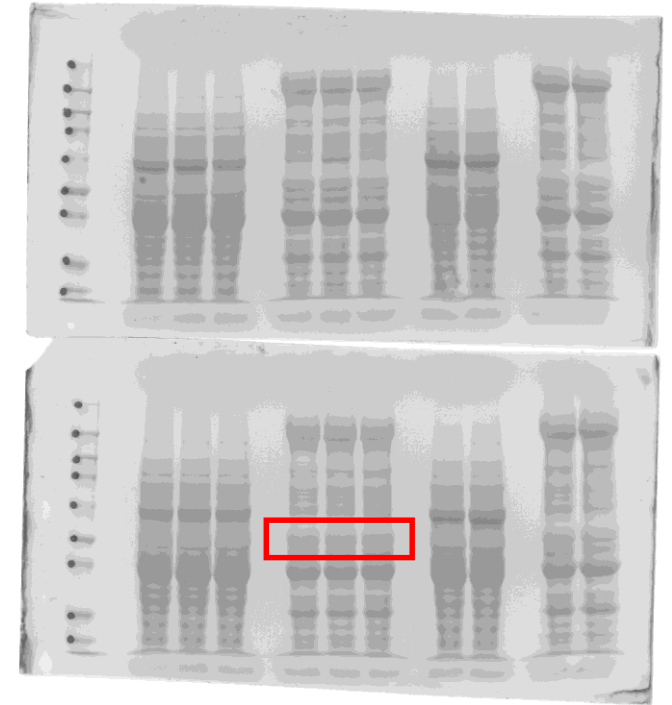

Ponceau S

# Figure 5A – MDC2

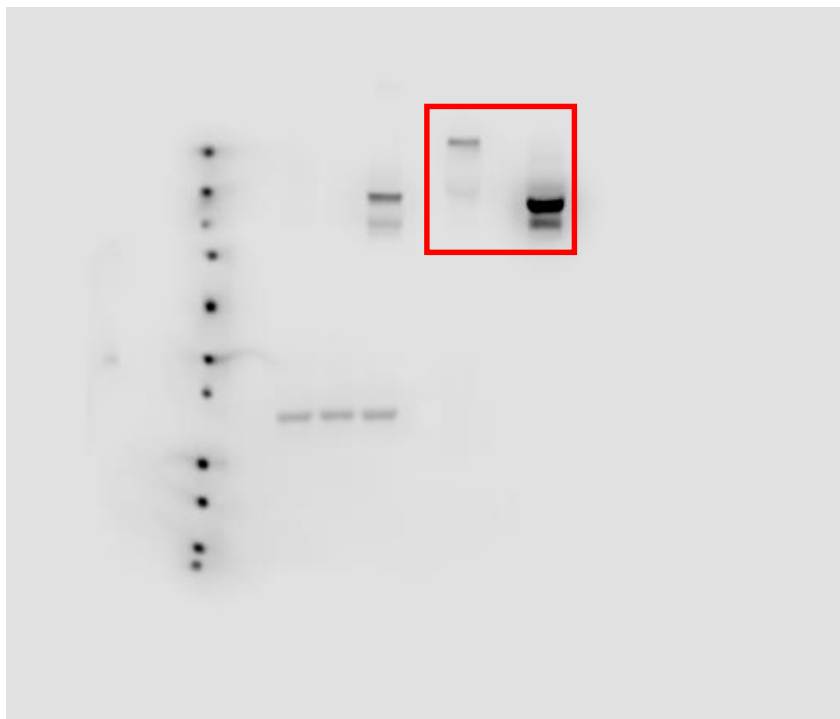

Mixture of: (Developmental Studies Hybridoma bank)

MANHINGE1B (Clone 10F9)  
MANEX1011B (Clone 1C7)  
MANEX1011C (Clone 4F9)

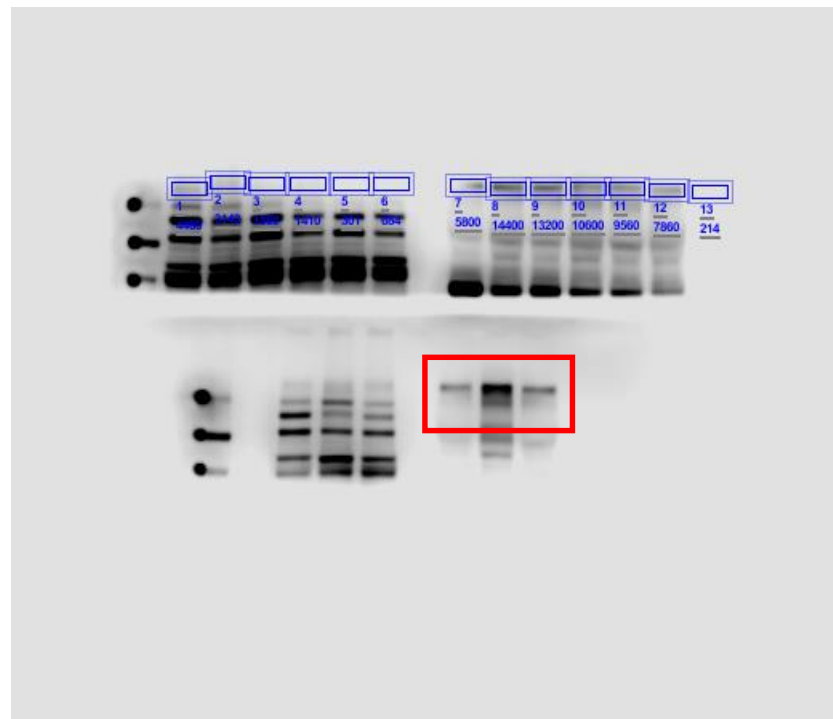

Utrrophin-A (ABN1739; EMD Millipore)

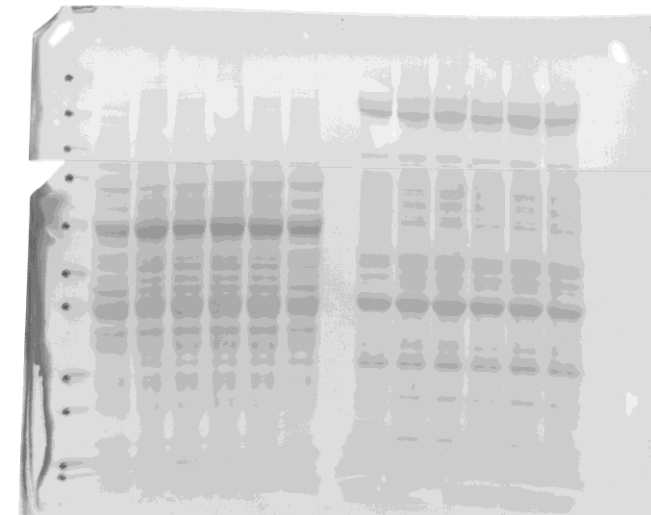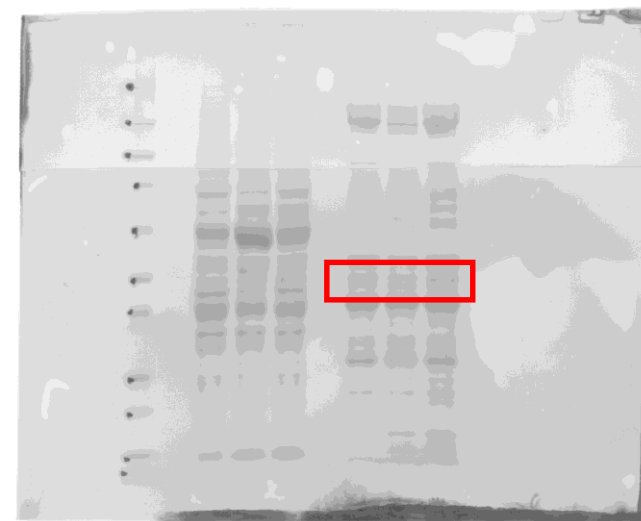

Ponceau S

# Figure 5A – MDC3

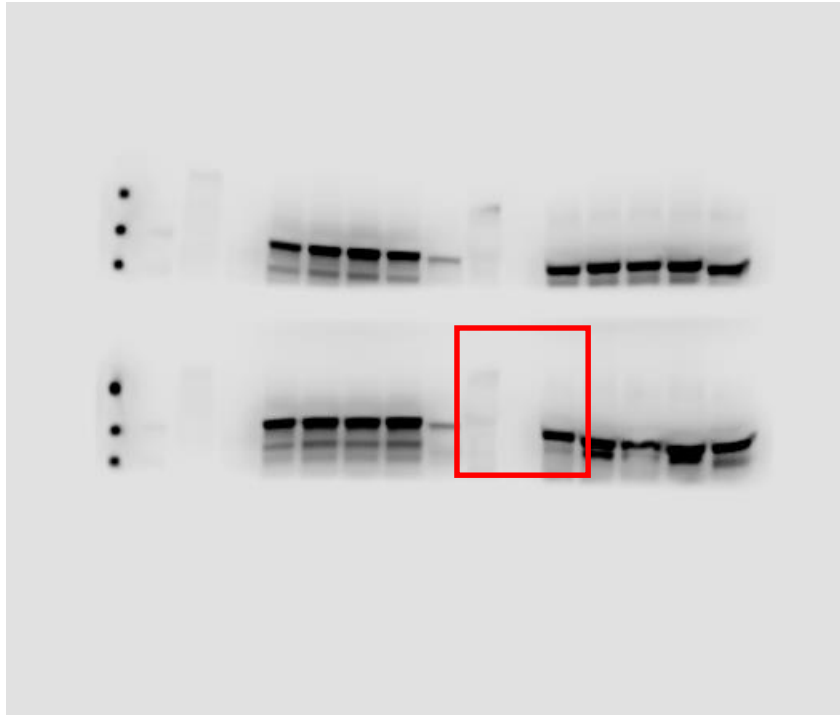

Mixture of: (Developmental Studies Hybridoma bank)

MANHINGE1B (Clone 10F9)  
MANEX1011B (Clone 1C7)  
MANEX1011C (Clone 4F9)

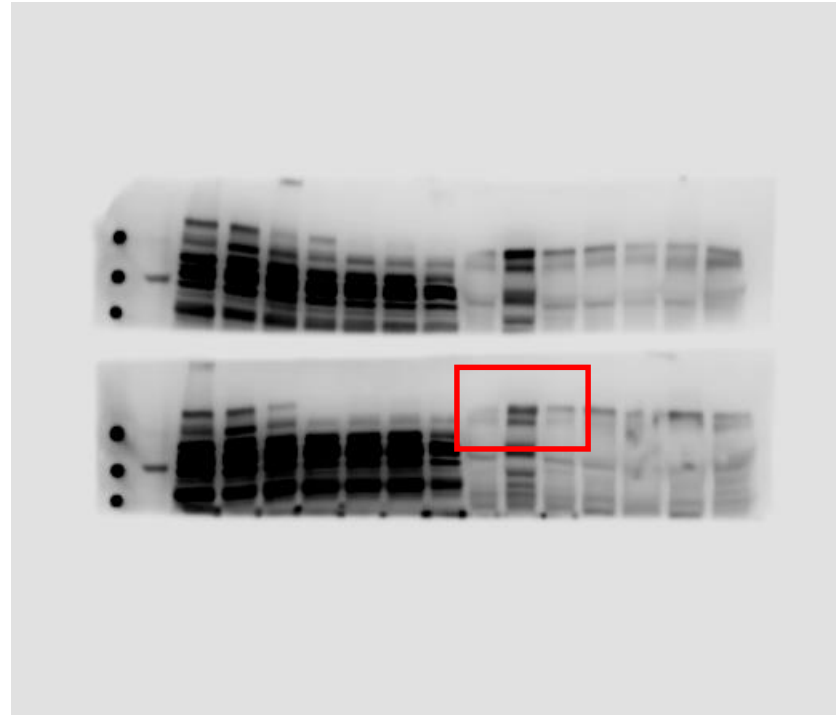

Utrophin-A (ABN1739; EMD Millipore)

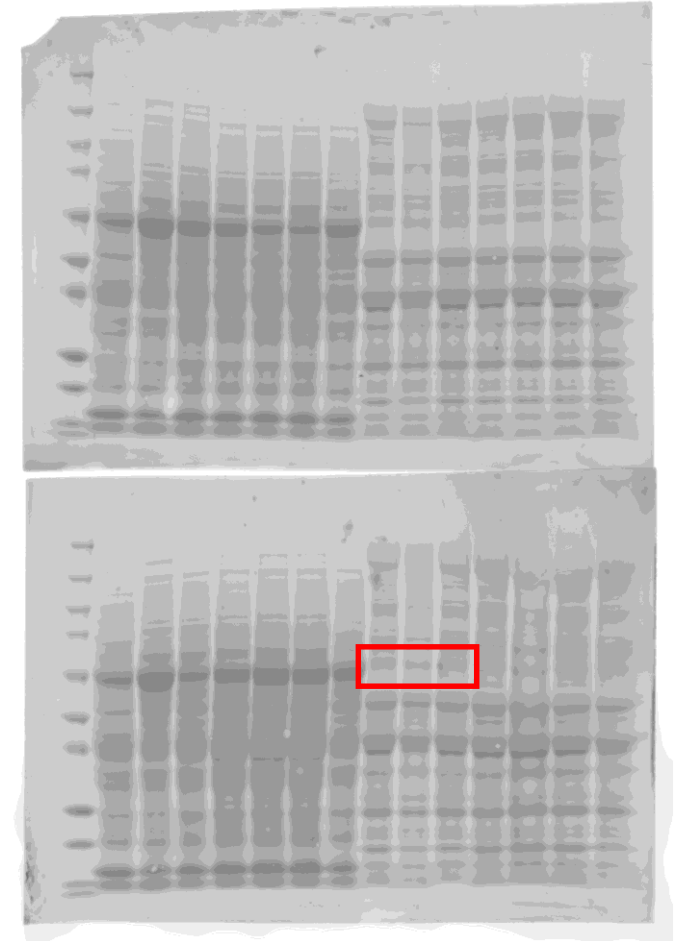

Ponceau S



# Supplemental Figure 2A – MDC1

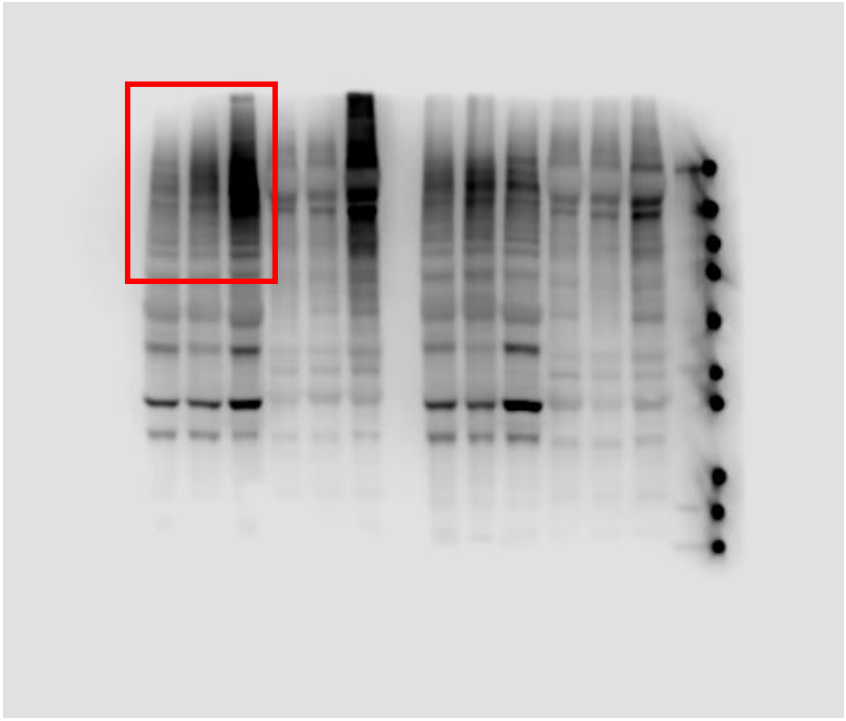

Polyubiquitin (K48-linkage; #4389, Cell Signaling)

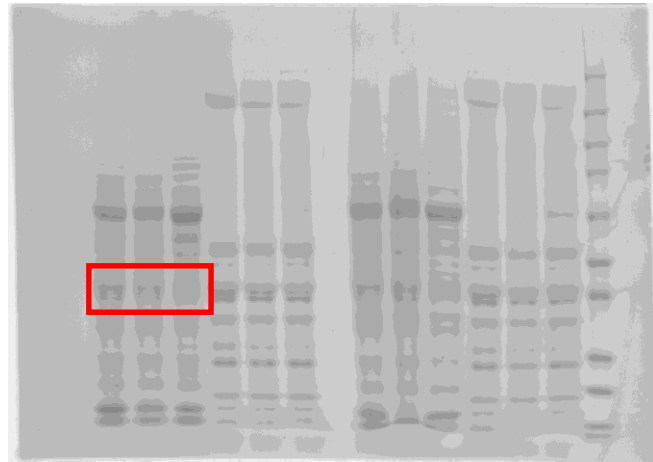

Ponceau S

# Supplemental Figure 2A – MDC4

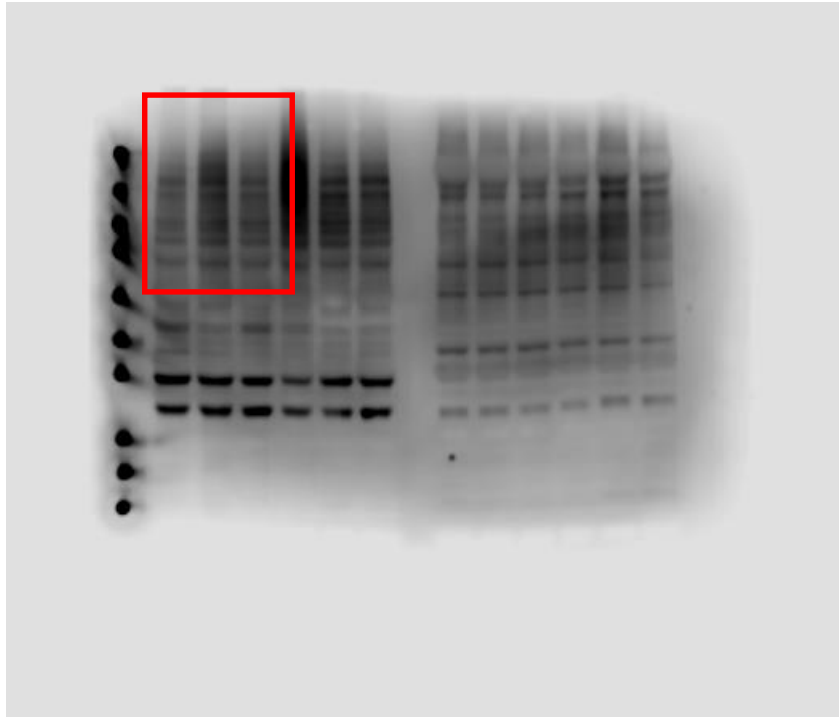

Polyubiquitin (K48-linkage; #4389, Cell Signaling)

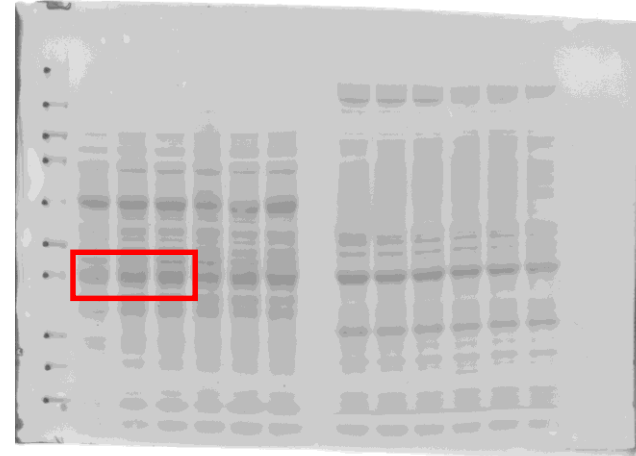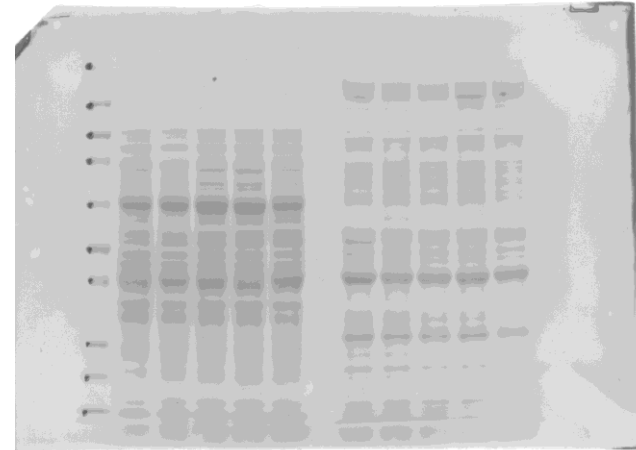

Ponceau S

# Supplemental Figure 2A – MDC2

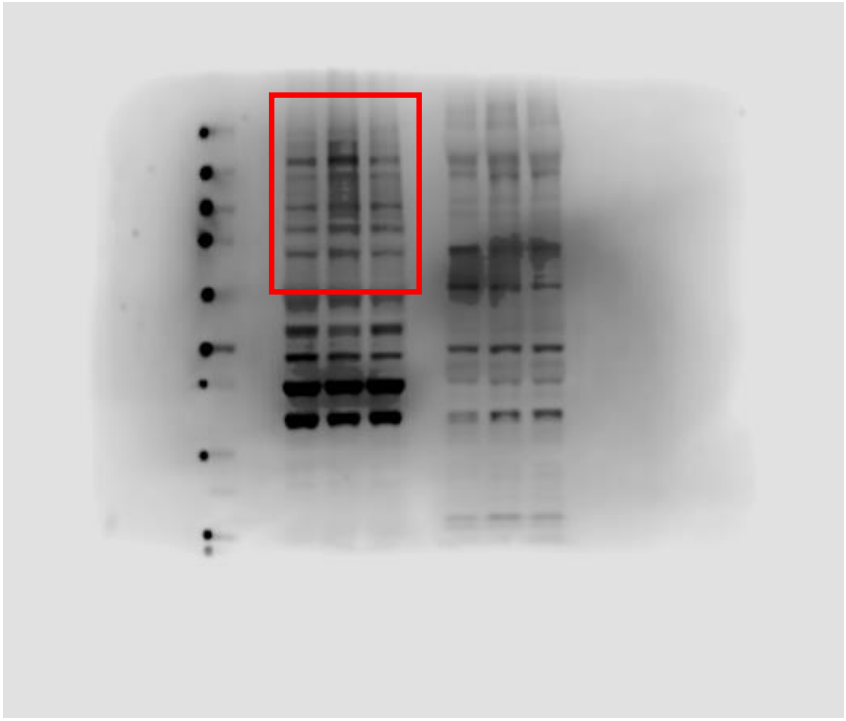

Polyubiquitin (K48-linkage; #4389, Cell Signaling)

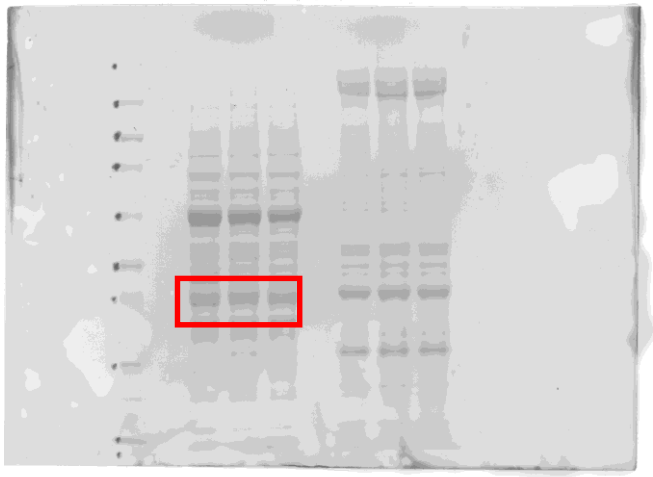

Ponceau S

# Supplemental Figure 2A – MDC3

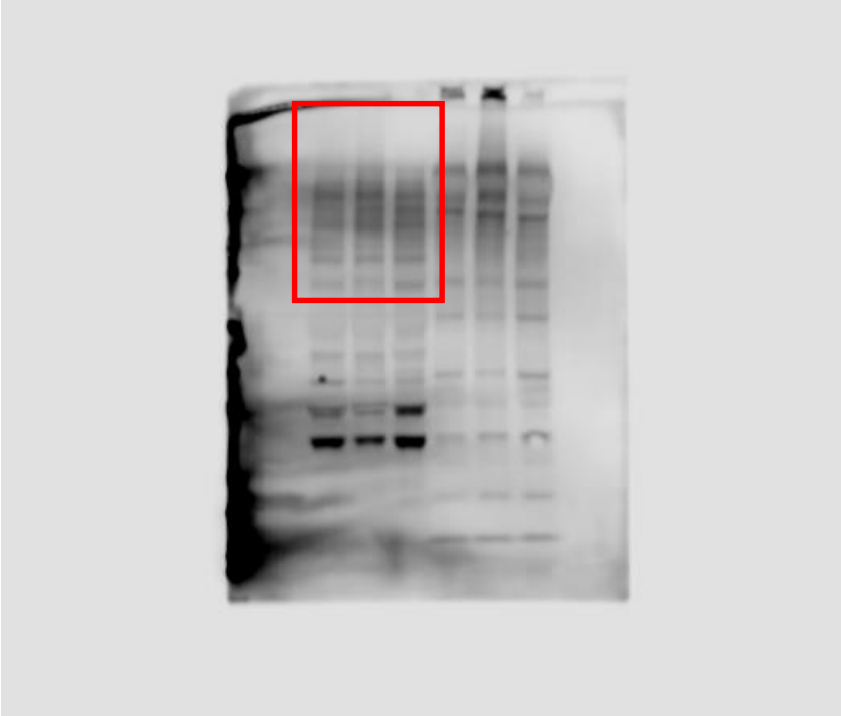

Polyubiquitin (K48-linkage; #4389, Cell Signaling)

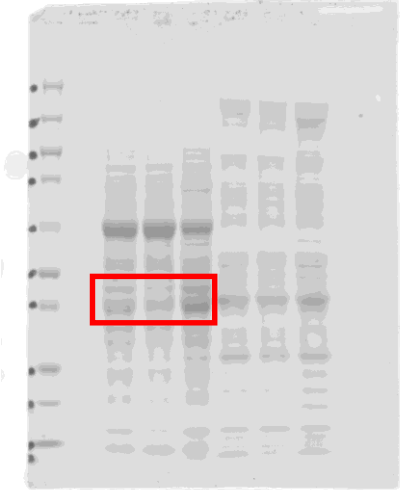

Ponceau S
